# Supplementary material
Source: PubMed Central journal article supplement (PMC4264933)
Supplement: embr0015-1305-sd1.pdf [file embr0015-1305-sd1.pdf]

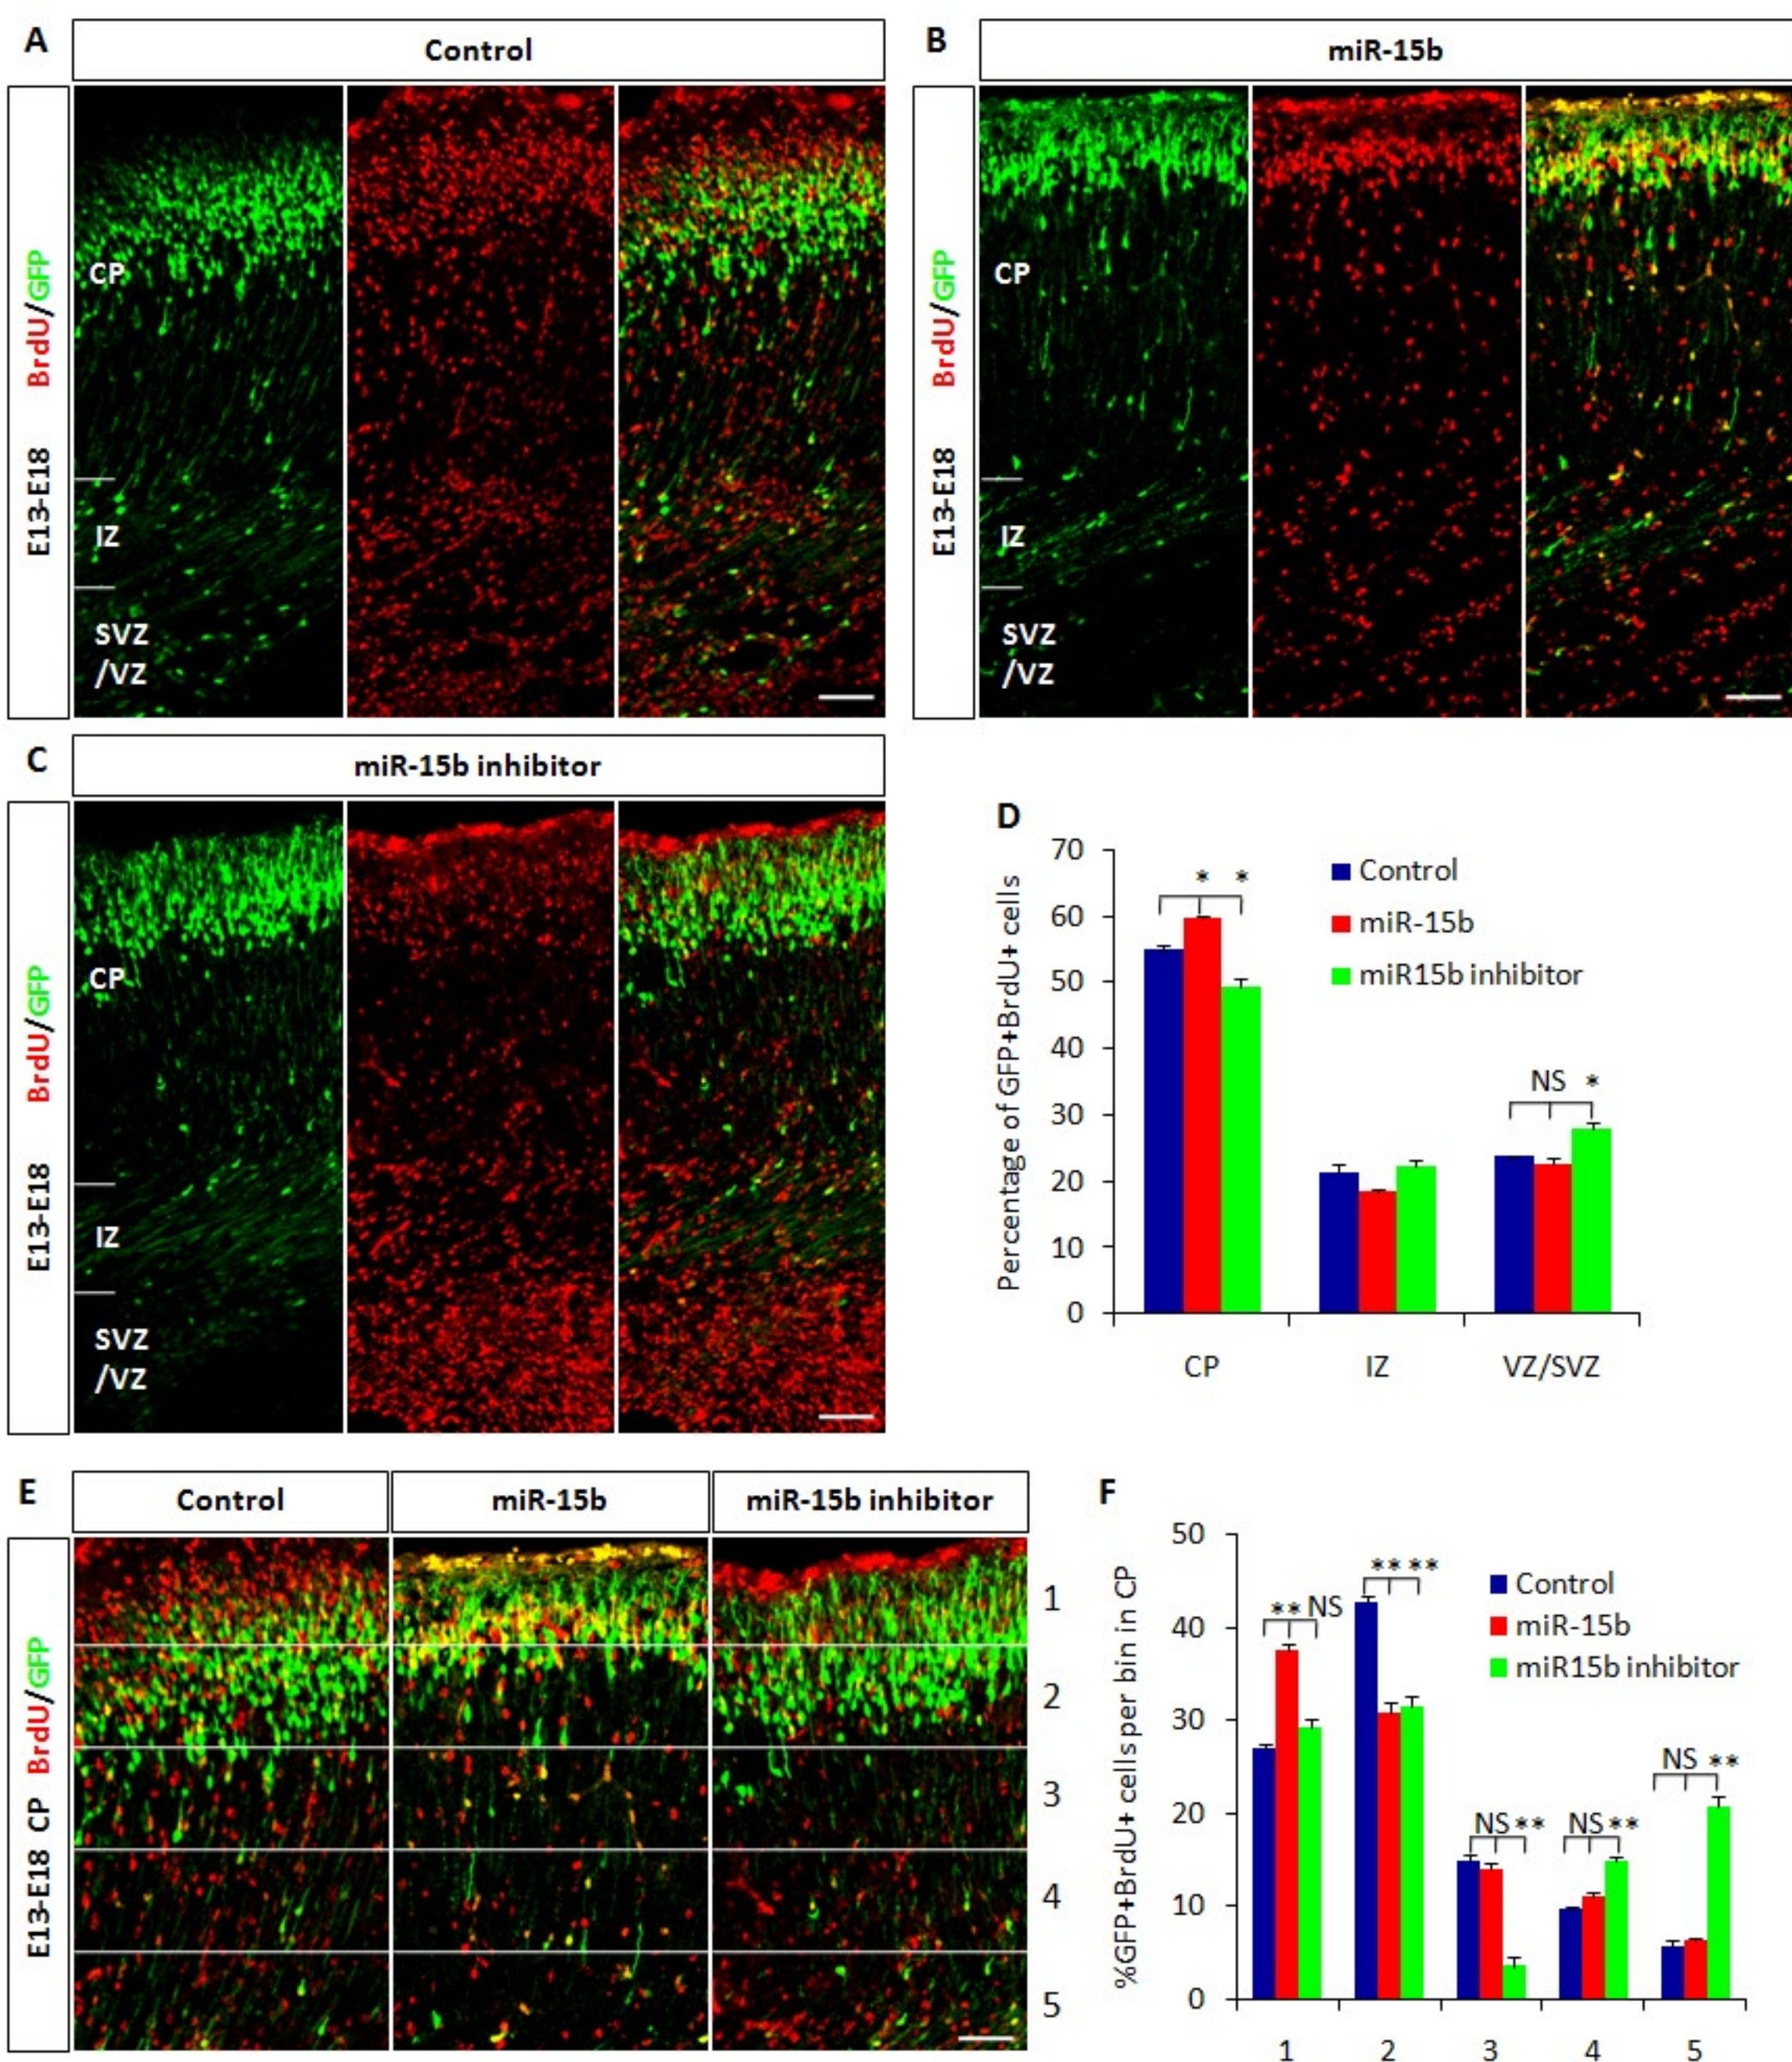

**Figure S1. miR-15b regulates neuronal migration, related to Figure 1.**

(A-C) miR-15b regulates neuronal migration. Embryonic brains were electroporated at E13. Mice were injected with BrdU (100 mg/kg) 24 h after electroporation and harvested at E18. Scale bar, 50  $\mu$ m.

(D) The percentage of GFP-BrdU double-positive cells is shown in each region of the cortex. CP, cortical plate; IZ, intermediate zone; SVZ, subventricular zone; VZ, ventricular zone.

(E, F) The cortical plate thickness was divided into 5 equal bins and the distribution of GFP-BrdU double-positive cells across the bins was determined. Scale bar, 50  $\mu$ m.

Data information: Values are mean  $\pm$  SEM; n=3; one-way-ANOVAs with Tukey's test for post-hoc multiple comparisons;

\*P<0.05; \*\*P<0.01; NS, non-significant.
