# Supplementary material
Source: PubMed Central journal article supplement (PMC4264933)
Supplement: embr0015-1305-sd3.pdf [file embr0015-1305-sd3.pdf]

**Figure S3. miR-15 b regulates 5hmC and 5mC levels, related to Figure 4.**

(A) miR-15b overexpression results in a significant decrease of the 5hmC level, and miR-15b inhibition increases the 5hmC level. (B) The level of 5mC is not significantly affected by miR-15b overexpression or inhibition. NPCs were infected with miR-15b overexpression lentivirus or transfected with miR-15b inhibitor, and the cells were stained with 5hmC or 5mC antibody 3 days later. (C) miR-15b regulates 5hmC and 5mC levels *in vivo*. Embryonic brains were electroporated with control, miR-15b, or miR-15b inhibitor at E13 and harvested at E16. Images of E16 brain sections immunostained with antibodies against 5hmC and 5mC. Scale bars, 5  $\mu$ m (A-C).
